# Supplementary material
Source: PubMed Central journal article supplement (PMC7301070)
Supplement: djz197_supplementary_data.pdf [file djz197_supplementary_data.pdf]

**Supplementary Table 1: Selected Cohort Characteristics by Urban/Rural Status**

| <b>Characteristic</b>              | <b>Urban<br/>No. (%)<br/>n=2150</b> | <b>Rural<br/>No. (%)<br/>n=285</b> | <b>p-value*</b> |
|------------------------------------|-------------------------------------|------------------------------------|-----------------|
| Age at Diagnosis, <i>mean (sd)</i> | 52.09 (11.09)                       | 54.03 (10.59)                      | 0.005           |
| Black Race                         | 1043 (48.5)                         | 148 (51.9)                         | 0.28            |
| Stage at Diagnosis, AJCC           |                                     |                                    |                 |
| 1                                  | 949 (44.1)                          | 110 (38.6)                         | 0.33            |
| 2                                  | 841 (39.1)                          | 129 (45.3)                         |                 |
| 3                                  | 274 (12.7)                          | 37 (13.0)                          |                 |
| 4                                  | 58 (2.7)                            | 6 (2.1)                            |                 |
| Missing                            | 28 (1.3)                            | 3 (1.1)                            |                 |
| Annual Household Income            |                                     |                                    |                 |
| <\$15,000                          | 302 (14.0)                          | 51 (17.9)                          | <0.001          |
| \$15,000-\$29,999                  | 371 (17.3)                          | 67 (23.5)                          |                 |
| \$30,000-\$49,999                  | 379 (17.6)                          | 59 (20.7)                          |                 |
| \$50,000 or more                   | 1000 (46.5)                         | 89 (31.2)                          |                 |
| Missing                            | 98 (4.6)                            | 19 (6.7)                           |                 |
| Insurance Status at Baseline       |                                     |                                    |                 |
| Private Insurance                  | 1624 (75.5)                         | 196 (68.8)                         | 0.06            |
| Medicaid                           | 115 (5.3)                           | 23 (8.1)                           |                 |
| Medicare                           | 294 (13.7)                          | 50 (17.5)                          |                 |
| Uninsured                          | 117 (5.4)                           | 16 (5.6)                           |                 |
| Educational Attainment             |                                     |                                    |                 |
| Less than High School              | 154 (7.2)                           | 28 (9.8)                           | <0.001          |
| High School Graduate               | 1097 (51.0)                         | 172 (60.4)                         |                 |
| College Graduate                   | 899 (41.8)                          | 85 (29.8)                          |                 |
| Occupation Category                |                                     |                                    |                 |
| Not White Collar                   | 573 (26.7)                          | 124 (43.5)                         | <0.001          |
| White Collar                       | 1556 (72.4)                         | 157 (55.1)                         |                 |

\* Differences by rurality assessed using two-sided Chi-square tests.; AJCC- American Joint Committee on Cancer

**Supplementary Table 2: Unadjusted and Adjusted Risk Difference for Cancer-Related Employment Effects**

| Factor                                                | Job Loss               |                      |                  | Income Loss            |                      |                  | Any Employment Change  |                      |                  |
|-------------------------------------------------------|------------------------|----------------------|------------------|------------------------|----------------------|------------------|------------------------|----------------------|------------------|
|                                                       | Risk difference (SE)   |                      |                  | Risk difference (SE)   |                      |                  | Risk difference (SE)   |                      |                  |
|                                                       | Unadjusted<br>(n=2431) | Clinical<br>(n=2400) | SES<br>(n=2266)  | Unadjusted<br>(n=2431) | Clinical<br>(n=2400) | SES<br>(n=2266)  | Unadjusted<br>(n=2435) | Clinical<br>(n=2404) | SES<br>(n=2266)  |
| <b>Race and Rurality (ref: White Urban)</b>           |                        |                      |                  |                        |                      |                  |                        |                      |                  |
| White Rural                                           | 3.86<br>(2.76)         | 3.77<br>(2.69)       | 2.6<br>(2.64)    | 10.7*<br>(4.85)        | 9.19<br>(4.74)       | 5.96<br>(4.70)   | 11.3*<br>(4.87)        | 9.86*<br>(4.77)      | 5.72<br>(4.74)   |
| Black Urban                                           | 8.43‡<br>(1.29)        | 6.66‡<br>(1.39)      | 4.55†<br>(1.46)  | 15.3‡<br>(2.19)        | 9.74‡<br>(2.42)      | 4.45<br>(2.65)   | 16.7‡<br>(2.20)        | 11.4‡<br>(2.44)      | 6.05*<br>(2.67)  |
| Black Rural                                           | 4.43<br>(2.45)         | 3.27<br>(2.31)       | 1.54<br>(2.28)   | 12.4**<br>(4.45)       | 6.84<br>(4.40)       | -2.39<br>(4.68)  | 14.4†<br>(4.48)        | 9.07*<br>(4.44)      | -0.056<br>(4.83) |
| Age (years)                                           | –                      | -0.14*<br>(0.06)     | -0.085<br>(0.06) | –                      | -0.61‡<br>(0.11)     | -0.60‡<br>(0.12) | –                      | -0.62‡<br>(0.11)     | -0.59‡<br>(0.12) |
| <b>AJCC<sup>1</sup> Stage (ref : Stage 1)</b>         |                        |                      |                  |                        |                      |                  |                        |                      |                  |
| Stage 2                                               | –                      | 1.55<br>(1.59)       | 1.61<br>(1.67)   | –                      | 0.96<br>(2.94)       | 0.59<br>(2.93)   | –                      | 1.57<br>(2.97)       | 1.43<br>(2.97)   |
| Stage 3                                               | –                      | -0.1<br>(1.93)       | -0.15<br>(2.00)  | –                      | 6.23<br>(4.68)       | 2.33<br>(4.65)   | –                      | 5.62<br>(4.69)       | 1.84<br>(4.65)   |
| Stage 4                                               | –                      | 6.98<br>(3.65)       | 7.76*<br>(3.83)  | –                      | 12<br>(8.07)         | 7.81<br>(7.74)   | –                      | 12.1<br>(8.18)       | 8.27<br>(7.94)   |
| <b>Surgery Type (ref : Breast Conserving Surgery)</b> |                        |                      |                  |                        |                      |                  |                        |                      |                  |
| Total Mastectomy                                      | –                      | -2.41<br>(1.46)      | -2.61<br>(1.53)  | –                      | 0.24<br>(3.02)       | 0.5<br>(3.08)    | –                      | 0.12<br>(3.05)       | 0.48<br>(3.10)   |
| <b>Treatments Received</b>                            |                        |                      |                  |                        |                      |                  |                        |                      |                  |
| Chemotherapy                                          | –                      | 2.76<br>(1.57)       | 2.5<br>(1.63)    | –                      | 9.97‡<br>(3.20)      | 10.8‡<br>(3.17)  | –                      | 9.98†<br>(3.23)      | 11.1‡<br>(3.19)  |
| Radiation                                             | –                      | 2.33<br>(1.37)       | 2.78<br>(1.45)   | –                      | -1.08<br>(3.29)      | -0.53<br>(3.35)  | –                      | -1.14<br>(3.31)      | -0.42<br>(3.39)  |
| Endocrine Therapy                                     | –                      | -1.63                | -1.96            | –                      | -0.4                 | 1.11             | –                      | -0.3                 | 1.1              |

|                                               |   |        |        |   |        |        |   |        |        |
|-----------------------------------------------|---|--------|--------|---|--------|--------|---|--------|--------|
|                                               | - | (1.36) | (1.47) | - | (2.67) | (2.62) | - | (2.69) | (2.65) |
| Trastuzumab                                   | - | 0.23   | 0.72   | - | 1.29   | 0.41   | - | 1.08   | 0.22   |
|                                               | - | (1.58) | (1.69) | - | (3.46) | (3.49) | - | (3.50) | (3.52) |
| <b>Comorbidities</b>                          |   |        |        |   |        |        |   |        |        |
| Obesity                                       | - | 0.62   | 0.68   | - | 2.45   | 2.18   | - | 2.73   | 2.46   |
|                                               | - | (1.62) | (1.66) | - | (3.57) | (3.62) | - | (3.58) | (3.63) |
| Hypertension                                  | - | 0.16   | -0.37  | - | 2.71   | 0.18   | - | 2.48   | 0.14   |
|                                               | - | (1.47) | (1.44) | - | (2.74) | (2.77) | - | (2.76) | (2.79) |
| Diabetes                                      | - | -1.18  | -0.66  | - | 1.46   | -0.086 | - | 0.49   | -0.91  |
|                                               | - | (1.73) | (1.94) | - | (3.84) | (3.92) | - | (3.82) | (3.92) |
| <b>Occupation (ref: Not White Collar)</b>     |   |        |        |   |        |        |   |        |        |
| White Collar                                  | - | -      | -2.69  | - | -      | -2.41  | - | -      | -2.52  |
|                                               | - | -      | (1.62) | - | -      | (3.38) | - | -      | (3.44) |
| <b>Education (ref: Less than High School)</b> |   |        |        |   |        |        |   |        |        |
| High School Graduate                          | - | -      | 0.13   | - | -      | 0.42   | - | -      | 1.59   |
|                                               | - | -      | (2.40) | - | -      | (5.43) | - | -      | (5.49) |
| College Graduate                              | - | -      | -1.03  | - | -      | -5.82  | - | -      | -5.3   |
|                                               | - | -      | (2.79) | - | -      | (6.06) | - | -      | (6.12) |
| <b>Marital Status (ref: single)</b>           |   |        |        |   |        |        |   |        |        |
| Married                                       | - | -      | -1.67  | - | -      | 1.6    | - | -      | 0.43   |
|                                               | - | -      | (1.63) | - | -      | (3.84) | - | -      | (3.97) |
| Widowed                                       | - | -      | -0.67  | - | -      | 1.48   | - | -      | 1.16   |
|                                               | - | -      | (2.51) | - | -      | (5.39) | - | -      | (5.50) |
| Separated/<br>Divorced                        | - | -      | 4.49*  | - | -      | 9.90*  | - | -      | 9.11*  |
|                                               | - | -      | (2.11) | - | -      | (4.19) | - | -      | (4.27) |
| <b>Insurance Status (ref: Private)</b>        |   |        |        |   |        |        |   |        |        |
| Medicaid                                      | - | -      | -1.3   | - | -      | -3.91  | - | -      | -5.72  |
|                                               | - | -      | (3.12) | - | -      | (5.41) | - | -      | (5.36) |
| Medicare                                      | - | -      | 5.94   | - | -      | 9.58   | - | -      | 9.17   |
|                                               | - | -      | (3.13) | - | -      | (4.91) | - | -      | (4.95) |
| Uninsured                                     | - | -      | 9.98*  | - | -      | 19.8†  | - | -      | 22.5†  |

|                                                    |      |      |        |      |      |        |      |      |        |
|----------------------------------------------------|------|------|--------|------|------|--------|------|------|--------|
|                                                    | -    | -    | (4.43) | -    | -    | (7.37) | -    | -    | (7.17) |
| <b>Annual Household Income (ref: &lt;\$15,000)</b> |      |      |        |      |      |        |      |      |        |
| \$15,000-                                          |      |      | 3.96†  |      |      | 4.84   |      |      | 5.34   |
| \$29,999                                           | -    | -    | (1.34) | -    | -    | (4.86) | -    | -    | (4.93) |
| \$30,000 –                                         |      |      | 6.89‡  |      |      | 2.89   |      |      | 2.49   |
| \$49,999                                           | -    | -    | (1.94) | -    | -    | (5.45) | -    | -    | (5.60) |
| \$50,000+                                          | -    | -    | 5.74*  | -    | -    | -2.61  | -    | -    | -1.82  |
|                                                    | -    | -    | (2.34) | -    | -    | (5.80) | -    | -    | (6.03) |
| <i>N</i>                                           | 2431 | 2404 | 2266   | 2431 | 2404 | 2266   | 2431 | 2404 | 2266   |

\* p-value <.05; † p-value<.01; ‡ pvalue<.001
